# Supplementary material
Source: PubMed Central journal article supplement (PMC5799878)
Supplement: pr7b00732_si_001.pdf [file pr7b00732_si_001.pdf]

## Protein Expression Report

**Date:** 2015-03-02

**Reported by:** Dr. Michael Forchheim, PolyQuant GmbH

**Order:** Expression / Purification

<sup>15</sup>N-labelled QconCat: Qcstel01

### Aim:

The <sup>15</sup>N- labelled QconCat peptide is expressed in BL21(DE3) in 0.2l scale and purified by IMAC (Ion Metal Affinity Chromatography).

### Construct:

>Qcstel01

MAGRQSEPVYETTLADLQKFLWNWDKGTPTIQNAVVLLEKVDINVYRANVQLVGTSTLLTRATVDSLPIRDLIGS  
FVREEIILIAIKVGELVSLGKSVSQVVKVNYTDEVSIGYREFVTEVVGETKNASVSEAAAQESKVAQELFQKTSY  
NDTHQYRVSTVVYGNDAIAVKPRIPTPSIPITKISVQSTLNEITIPATGNTNIRAADYGADAASGGHDNKFV  
VGQADDNSAGAVRIAVGFNYAAFKDIVTENVYFLERIHIVQKQAGAGSAPPKGASGEDVIELQSRFGLPVDGLA  
GAKAVNTAASFLAKEGDPLEIFVDRFITNILQTAQKISQTYNVPLASLAKGDGISYNTYRANAYGHDYVPVAKL  
SPLLQELKLNFEFDLKIALDDGSIVGFSAKSSSLPALADVWRAADGSVILTVSKIIE LAPQAVDKTFVSLEPNR  
NTFFPTQNELVEISRQATVVMTYERGSSLTQSYTGII EAAGREGVNDNEEGFFSARLAAALEHHHHHHH

|          |            |
|----------|------------|
| MW       | = 56149.18 |
| Residues | = 519      |
| pI       | = 5.0333   |

### Best Clone Screen:

#### Cell growth:

The expression level of several clones (up to 6)/construct was tested in 1 ml-scale in LB-medium, supplemented with 100 µg/ml ampicillin, at 37°C and 180 rpm.

Protein expression was induced at OD<sub>600</sub> = 0.6 by addition of 1 mM IPTG. After induction, cultures were incubated for 4 h.

The cells were harvested by centrifugation (16600xg, 3 min, 4°C).

#### Cell lysis:

Cell pellets were resuspended in 150 µl of cell lysis buffer.

Cell lysis buffer: 50 mM NaP, pH 7.4

100 µg/ml DNaseI

1 mM MgCl<sub>2</sub>

200 µg/ml lysozyme

3 mM DTT

EDTA-free Protease Inhibitor Cocktail (Roche)

The suspension was sonicated briefly (10 sec, 40% amplitude) and then centrifuged (16600xg, 10 min, 4°C). The supernatant was transferred to a fresh vial and the remaining pellet was resuspended in 150 µl lysis buffer.

#### Electrophoresis:

15 µl of the supernatant and the resuspended pellets were mixed with 5 µl 4xSDS-Loading Dye and incubated at 95°C for 10 min. 15 µl sample/lane were loaded onto a 12.5% SDS-Polyacrylamide-gel.

Electrophoresis was performed at 180 V for 65 min. The gel was stained with Coomassie Blue.

#### Abbreviations used:

M: Marker

P: Pellet

SN: Supernatant

-: uninduced control

1-5: clone number

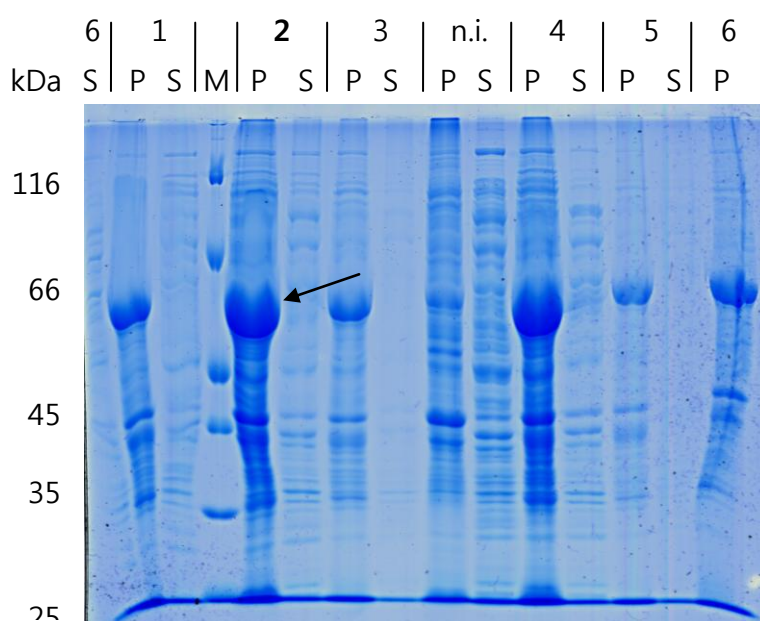

Clone 2 showed the highest levels of induction and was stored as glycerol stock and used for test expression. The QconCAT was detected in the insoluble fraction.

### Test Expression:

Clone 2 was inoculated in 300 ml LB + Amp and grown to  $OD_{600} = 0.6$ . Expression was induced by addition of 1 mM IPTG (final concentration) and the culture was incubated at 37°C for 4-5 hours.

The pellet was collected by centrifugation for 10 minutes at 6000xg. After removing the medium, the pellet was stored at -70°C until use.

The pellet was resuspended in 5 ml cell lysis buffer.

|                    |                                                  |                   |
|--------------------|--------------------------------------------------|-------------------|
| Cell lysis buffer: | 50mM                                             | NaP, pH 7.4       |
|                    | 100µg/ml                                         | DNaseI            |
|                    | 1mM                                              | MgCl <sub>2</sub> |
|                    | 200µg/ml                                         | lysozyme          |
|                    | 3mM                                              | DTT               |
|                    | 1x EDTA-free Protease Inhibitor Cocktail (Roche) |                   |

Cells were lysed by sonication (amplitude = 40%, 4 x 15sec, on ice).

The cell lysate was centrifuged (4°C, 16000xg, 10min) and the soluble fraction was removed.

The remaining pellet representing the insoluble fraction of the cell lysate was suspended in 1 ml solubilisation buffer.

|                                |        |             |
|--------------------------------|--------|-------------|
| Solubilisation/binding buffer: | 50 mM  | NaP, pH 7.4 |
|                                | 6 M    | GdnHCl      |
|                                | 300 mM | NaCl        |
|                                | 20 mM  | Imidazole   |

The suspension was incubated on ice for 1-2 hours.

In the meantime, Ni-NTA columns (approx. 1 ml beads) were prepared by washing several times with binding buffer.

The lysate was applied and allowed to pass the column by gravity flow. The flow-through was collected. After two washes with binding buffer (W1 & W2), the column was washed with binding buffer supplemented with 40 mM Imidazole (W3 & W4). The bound protein was eluted with elution buffer (binding buffer with 500 mM Imidazole; 5x1000 µl).

Samples of the intermediate steps and the eluted fractions were dialyzed against 0.1% FA and analyzed via 12.5% SDS-PAGE and Coomassie staining.

Abbreviations used:

M: Marker  
 CLS: cell lysis supernatant  
 RP: remaining pellet after solubilisation  
 L: lysate (solubilised inclusion bodies)  
 F: flow through  
 W: wash  
 E: eluate

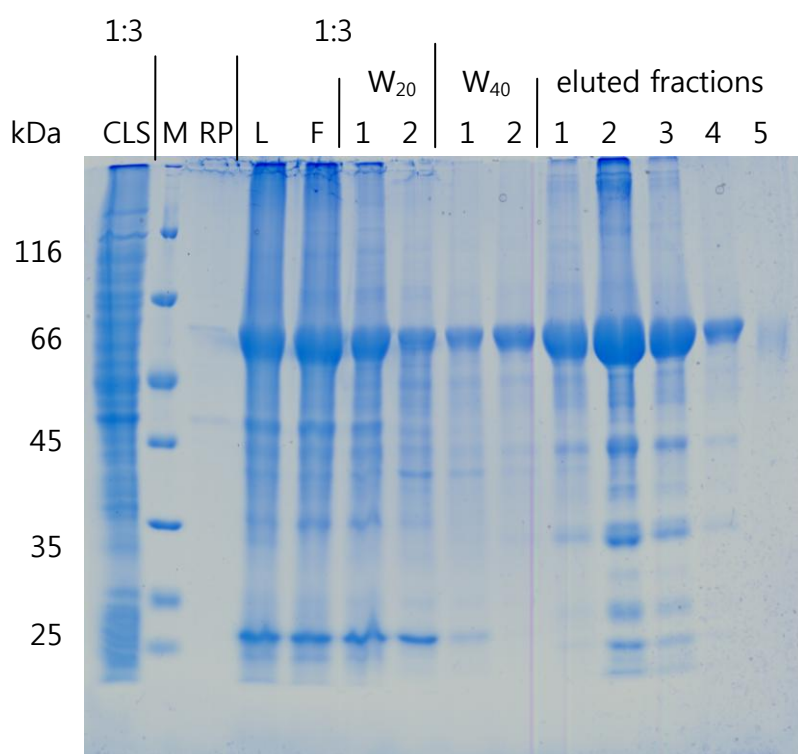

The fractions containing the highest amount of protein (2&3) were united and used for determining the appropriate solubilisation and storage buffer.

### Buffer screen:

To determine the appropriate solubilisation and storage buffer, an aliquot of the purified protein was dialyzed against the buffers listed below.

- 1: 0.1% FA
- 2: 0.1% TFA
- 3: 0.5% HAc
- 4: 50 mM  $\text{NH}_4\text{HCO}_3$  pH 9.0
- 5: PBS
- 6: 0.1% SDS, 125 mM Tris pH 6.8

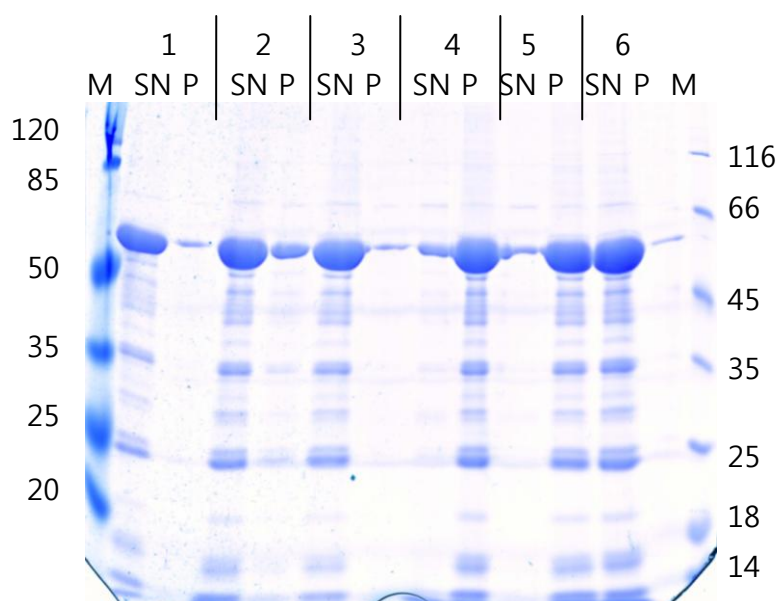

Solubility of the QconCAT: 0.1% SDS, 125 mM Tris pH 6.8 > 0.5% HAc > 0.1% FA > 0.1 % TFA >>> 50 mM  $\text{NH}_4\text{HCO}_3$  pH 9.0 > PBS. 0.5% HAc was chosen as detergent- free storage buffer.

### Purification of $^{15}\text{N}$ -labeled QconCAT:

Medium:

Minimalmedium containing  $^{15}\text{N}$ :

|                                  |                |
|----------------------------------|----------------|
| Na <sub>2</sub> HPO <sub>4</sub> | 48 mM          |
| KH <sub>2</sub> PO <sub>4</sub>  | 22 mM          |
| NaCl                             | 8.5 mM         |
| <sup>15</sup> NH <sub>4</sub> Cl | 19 mM          |
| MgSO <sub>4</sub>                | 1 mM           |
| CaCl <sub>2</sub>                | 0.1 mM         |
| Glucose                          | 0.2 % (wt/vol) |
| Ampicillin                       | 100 µg/ml      |

Cells: BL21(DE3)- pET21a-QcStelder clone 2

Growth conditions:

Cells were grown in 0.2 l Medium at 37°C until OD<sub>600</sub> reached 0.5-0.6. Protein expression was induced by addition of 1 mM IPTG. Protein was expressed for 4-5 h at 37°C. Cells were harvested by centrifugation at 6000 x g for 15 min. The cell pellet was stored at -70°C.

**Lysis and IMAC:**

All buffers for cell lysis and purification have to be pre-chilled at 4°C.

Buffer:

Lysis buffer:        50 mM        NaP, pH 7.4  
                         100 µg/ml    DNaseI  
                         1 mM        MgCl<sub>2</sub>  
                         200 µg/ml    Lysozyme  
                         3 mM        DTT  
                         1 x EDTA free Protease Inhibitor

Binding buffer:     50 mM        NaP, pH 7.4  
                         6 M        GdnHCl  
                         500 mM     NaCl  
                         40 mM     Imidazole  
                         1 mM       DTT

Elution buffer:     50 mM        NaP, pH 7.4

|        |           |
|--------|-----------|
| 6 M    | GdnHCl    |
| 500 mM | Imidazole |
| 1 mM   | DTT       |

#### Protocol:

The cell pellet was suspended in 5 ml lysis buffer.

Cells were disrupted by sonication (5 x 15 sec, 40% amplitude) on ice. The cell lysate was centrifuged (16000 x g, 10min, 4°C).

2 ml of Ni-Sepharose 6 FF-slurry (GE-Healthcare) were equilibrated in binding buffer.

After centrifugation the soluble fraction of the cell lysate was removed. The insoluble material was suspended in 8 ml binding buffer. The samples were kept on ice for 2 h to ensure proper solubilisation of the inclusion bodies.

After centrifugation (16000xg, 10 min, 4°C) the supernatant was loaded onto the equilibrated resin and allowed to pass the column by gravity flow. The column was washed 2 times (wash 1 = 4 ml, wash 2 = 8 ml) with binding buffer to remove unbound material. Target proteins were eluted with elution buffer in 6 fractions of 1 ml.

Samples for SDS-PAGE were dialysed against 0,5% HAc.

#### Electrophoresis (SDS-PAGE):

15 µl of each sample were mixed with 5 µl 4XSDS-Loading Dye and incubated at 95°C for 10 min.

Electrophoresis was performed at 180 V for 90 min. The gel was stained with Coomassie Blue.

#### Abbreviations:

|     |                                                           |
|-----|-----------------------------------------------------------|
| CLS | cell lysate supernatant                                   |
| RP  | remaining pellet after solubilisation of inclusion bodies |
| L   | load                                                      |
| F   | flowthrough                                               |
| W   | wash                                                      |
| E   | eluate                                                    |

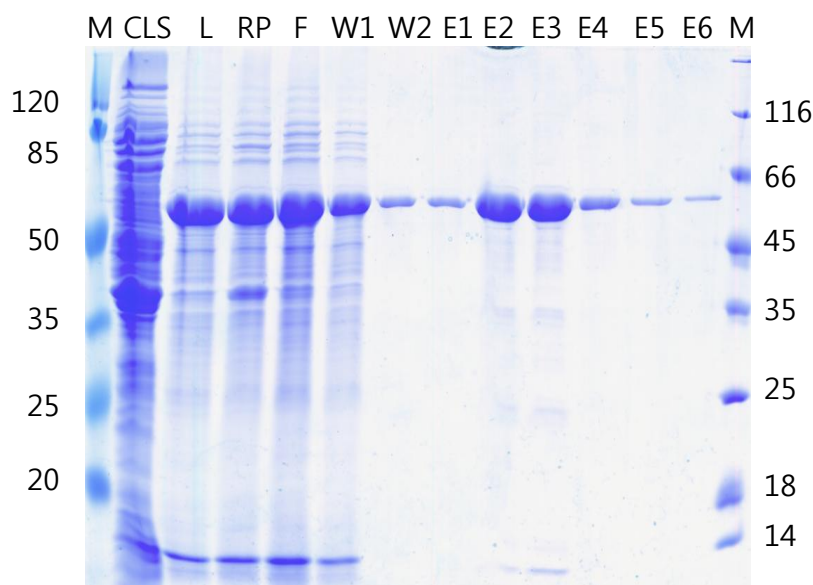

Due to the high protein content, the flow-through fraction was re-purified by diluting with binding buffer w/o imidazole to 20 mM imidazole and re-applying to the Ni-sepharose. After 2 washes with binding buffer, proteins were eluted and samples for western blot analysis were prepared.

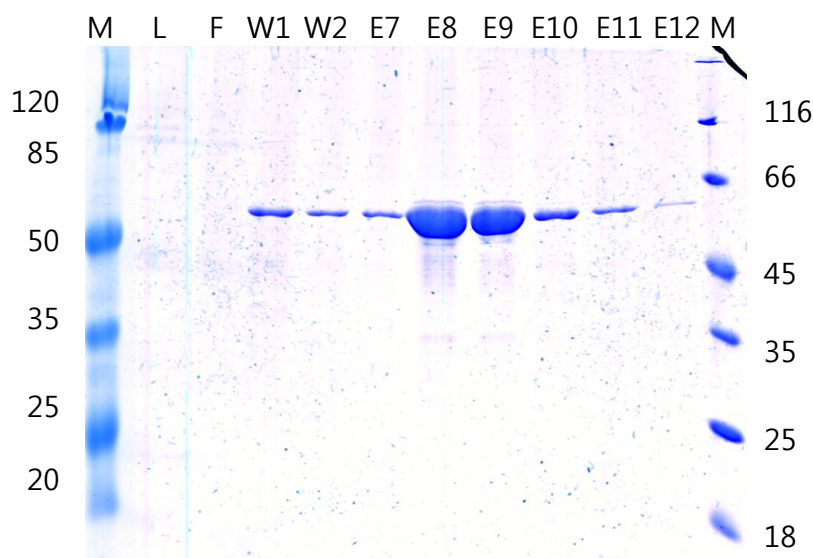

Fractions 2, 3, 8 & 9 were pooled and dialysed against 0.5% HAc. Protein concentration of the pooled samples was determined via Bradford-assay.

## Summary:

All six constructs could be over-expressed  $^{15}\text{N}$ -labelled at a high level.

The QconCATs were purified by Ion Metal Affinity Chromatography.

The produced material will be used for LC-MS-optimization.
