# Supplementary material
Source: PubMed Central journal article supplement (PMC5799878)
Supplement: pr7b00732_si_005.pdf [file pr7b00732_si_005.pdf]

# Stoichiometry, absolute abundance and localization of proteins in the *Bacillus cereus* spore coat insoluble fraction determined using a QconCAT approach

Sacha K. Stelder<sup>§, †, \*</sup>, Celia Benito de Moya<sup>§</sup>, Huub C.J. Hoefsloot<sup>#</sup>, Leo J. de Koning<sup>†</sup>,  
Stanley Brul<sup>§, ‡</sup>, Chris G. de Koster<sup>†, ‡</sup>

§ : Molecular Biology & Microbial Food Safety

†: Mass Spectrometry of Biomacromolecules

#: Biosystems Data Analysis, Swammerdam Institute for Life Sciences, University of  
Amsterdam, Science Park 904, 1098 XH, Amsterdam, The Netherlands.

\*Corresponding Author: s.k.stelder@uva.nl

‡Contributed equally

Supplementary Material S1 – QconCAT design and expression report by PolyQuant

Supplementary Material S2 – Graphs of time required for completed digestion of each Q-peptide

Supplementary Table S1 – Protein identifications in *B.cereus* and  $\Delta$ CotE spore isolates

Supplementary Table S1 – Isotope ratios (L/H) of Q-peptides in *B.cereus* and  $\Delta$ CotE
